# Supplementary material for: RNA-seq Based Transcription Characterization of Fusion Breakpoints as a Potential Estimator for Its Oncogenic Potential
Source: Biomed Res Int. 2017 Oct 17;2017:9829175. doi: 10.1155/2017/9829175 (PMC5664375; doi:10.1155/2017/9829175)
Supplement: Supplementary file 1 — Figure S1: The boxplot comparison of iFCRmax values among four groups. Figure S2: The boxplot comparison of iFCRmin values among four groups. Figure S3: The comparison of fold changes of parents' genes and iFCR value (x-axis). [file 9829175.f1.zip]

Archive with 2 entries (2 files):
- mat.9829175.v2.xlsx
- Supp Figures.docx
