# Supplementary material for: RNA-seq Based Transcription Characterization of Fusion Breakpoints as a Potential Estimator for Its Oncogenic Potential
Source: Biomed Res Int. 2017 Oct 17;2017:9829175. doi: 10.1155/2017/9829175 (PMC5664375; doi:10.1155/2017/9829175)
Supplement: Supplementary file 1 — Figure S1: The boxplot comparison of iFCRmax values among four groups. Figure S2: The boxplot comparison of iFCRmin values among four groups. Figure S3: The comparison of fold changes of parents' genes and iFCR value (x-axis). [file 9829175.f1.zip › mat.9829175.v2.xlsx]

## Sheet: Cell Line
Sample	5'Gene	3'Gene	5'Normal Overlapping Reads	3'Normal Overlapping Reads	Fusion Reads	iFCR-average
KPL-4	BSG	NFIX	112	5	36	0.307692
KPL-4	PPP1R12A	SEPT10_	7	3	8	0.8
KPL-4	NOTCH1	NUP214	4	17	10	0.47619
SK-BR-3-440	SUMF1	LRRFIP2	6	19	19	0.76
SK-BR-3-440	WDR67	ZNF704	12	25	6	0.162162
SK-BR-3-440	RARA	PKIA	3	1	23	5.75
SK-BR-3-440	DHX35	ITCH	2	7	5	0.555556
SK-BR-3-440	ANKHD1	PCDH1	27	3	18	0.6
SK-BR-3-440	CCDC85C	SETD3	11	7	12	0.666667
SK-BR-3-440	TATDN1	GSDMB	27	13	475	11.875
SK-BR-3-440	CYTH1	EIF3H	7	162	40	0.236686
SK-BR-3-440	NFS1	PREX1	52	75	14	0.110236
SK-BR-3-441	SUMF1	LRRFIP2	17	13	19	0.633333
SK-BR-3-441	WDR67	ZNF704	33	52	6	0.0705882
SK-BR-3-441	RARA	PKIA	12	1	23	1.76923
SK-BR-3-441	DHX35	ITCH	2	7	5	0.555556
SK-BR-3-441	ANKHD1	PCDH1	32	5	18	0.486486
SK-BR-3-441	CCDC85C	SETD3	13	6	12	0.631579
SK-BR-3-441	TATDN1	GSDMB	30	15	475	10.5556
SK-BR-3-441	CYTH1	EIF3H	5	207	40	0.188679
SK-BR-3-441	NFS1	PREX1	58	130	14	0.0744681
BT474-438	ACACA	STAC2	115	7	129	1.05738
BT474-438	CPNE1	PI3	118	1	6	0.0504202
BT474-438	DIDO1	KIAA0406	12	15	9	0.333333
BT474-438	ZMYND8	CEP250	25	2	49	1.81481
BT474-438	LAMP1	MCF2L	54	32	8	0.0930233
BT474-438	SKA2	MYO19	67	42	15	0.137615
BT474-438	RPS6KB1	SNF8	47	248	111	0.376271
BT474-438	VAPB	IKZF3	202	15	67	0.308756
BT474-438	RAB22A	MYO9B	63	12	21	0.28
BT474-439	ACACA	STAC2	162	3	129	0.781818
BT474-439	DIDO1	KIAA0406	9	13	9	0.409091
BT474-439	ZMYND8	CEP250	49	13	49	0.790323
BT474-439	LAMP1	MCF2L	51	20	8	0.112676
BT474-439	SKA2	MYO19	61	42	15	0.145631
BT474-439	RPS6KB1	SNF8	58	364	111	0.263033
BT474-439	VAPB	IKZF3	228	11	67	0.280335
BT474-439	RAB22A	MYO9B	71	7	21	0.269231

## Sheet: Prostate Cancer
Sample	5'Gene	3'Gene	5'Gene Overlapping Reads	3'Gene Overlapping Reads	Fusion Reads	Type	iFCR-average
1T	TMPRSS2	ERG	32	78	19	R	0.172727
2T	SDHA	LOC220729	25	10	3	T	0.0857143
2T	NCOA7	CRBN	32	7	2	T	0.0512821
3T	SLC25A33	RYK	5	163	2	T	0.0119048
3T	TBC1D22A	ITPK1	38	105	2	T	0.013986
3T	EMB	ATG10	8	6	5	T	0.357143
3T	FBXO25	H19	582	34	4	T	0.00649351
4T	USP9Y	TTTY15	105	29	14	R	0.104478
5T	HPN	RPS2	329	14181	2	T	0.000137836
5T	TMPRSS2	ERG	105	62	26	R	0.155689
5T	ARFIP1	DOCK9	11	20	2	T	0.0645161
6T	STAT3	PDE8A	69	12	4	T	0.0493827
6T	PHF17	SNHG8	11	5908	65	T	0.0109816
6T	USP9Y	TTTY15	56	14	4	R	0.0571429
7T	FBXO28	CAPN2	6	19	3	T	0.12
7T	SDK1	AMACR	8	428	2	R	0.00458716
8T	IKZF2	MFF	0	161	2	T	0.0124224
9T	CAMTA1	INSR	358	7	10	T	0.0273973
9T	UPF3A	CDC16	299	29	109	T	0.332317
9T	DYRK1A	CMTM4	4	24	4	T	0.142857
10T	CTAGE5	KHDRBS3	141	43	2	R	0.0108696
10T	RAD50	PDLIM4	148	14	17	R	0.104938
11T	WWOX	IGF1	11	125	4	T	0.0294118
11T	SNRNP70	CAMK2B	547	31	2	T	0.00346021
11T	C20orf94	SYTL4	0	92	2	T	0.0217391
11T	PHF10	OCIAD1	29	254	2	T	0.00706714
12T	AQR	MARK3	14	89	4	T	0.038835
12T	DDX39	PAFAH1B1	32	2	2	T	0.0588235
12T	COL6A3	BRE	5	71	2	T	0.0263158
12T	USP9Y	TTTY15	67	26	3	R	0.0322581
13T	CD97	EMR2	11	3	2	T	0.142857
13T	ZC3H6	LRP1B	34	0	13	T	0.382353
13T	LRP1B	ZC3H6	0	34	3	T	0.0882353
13T	TMPRSS2	ERG	133	51	35	R	0.190217
14T	APLP2	MBOAT7	648	68	4	T	0.00558659
14T	CCDC91	RNF145	58	73	8	T	0.0610687
14T	MCF2L	SH3KBP1	18	19	2	T	0.0540541
14T	RPL31	ODF2L	1775	10	8	T	0.00448179
14T	FBLN1	LTBP2	820	0	7	T	0.00853658
14T	TAX1BP1	JAZF1	101	45	2	T	0.0136986
1N	MEIS2	LOC642587	219	136	2	N	0.0056338
1N	HACL1	C9orf3	4	250	4	N	0.015748
1N	PPP2R2C	ECH1	0	374	2	N	0.00534759
2N	PHF20	FAM48A	30	50	2	N	0.025
2N	RMND5B	DCTN4	17	6	2	N	0.0869565
3N	ZC3H4	LPPR2	34	67	4	N	0.039604
3N	CACNA1D	AMACR	4	47	2	N	0.0392157
3N	ELMO1	SMCHD1	9	175	2	N	0.0108696
4N	UBAP2L	C1orf43	132	272	2	N	0.0049505
6N	ZNF532	UBA3	58	78	2	N	0.0147059
6N	NCOA1	LAPTM4A	7	472	6	N	0.0125261
6N	CLDN12	HMGB2	69	308	2	N	0.00530504
7N	RASAL2	RFWD2	0	51	2	N	0.0392157
7N	PPP2R1B	CEP192	8	6	2	N	0.142857
9N	UPF3A	CDC16	297	34	20	N	0.060423
10N	GCNT1	PRUNE2	0	0	2	N	#DIV/0!
11N	SGMS1	ADD3	46	132	4	N	0.0224719
11N	TSPAN9	TFIP11	51	42	2	N	0.0215054
11N	ARG2	VTI1B	431	360	2	N	0.00252844
11N	MACROD2	SFRS15	0	60	2	N	0.0333333
11N	EGFR	ABCA8	36	96	2	N	0.0151515
11N	ZNF252	PSMD4	9	298	2	N	0.00651466
11N	TPM2	MYL6	1385	4816	4	N	0.000645057
12N	BUB3	PRKDC	74	14	2	N	0.0227273
12N	FBXO34	SAV1	14	92	2	N	0.0188679
12N	ANXA2	PRODH	19	17	2	N	0.0555556
12N	TJP1	NUS1	71	40	2	N	0.018018
12N	DHX40	WDR73	9	48	2	N	0.0350877
12N	ZNF557	WIF1	7	86	2	N	0.0215054
12N	CD97	EMR2	36	7	2	N	0.0465116
12N	USP53	NR3C2	41	3	2	N	0.0454545
12N	ZER1	GLIPR2	45	73	2	N	0.0169492
14N	C1orf57	NVL	60	41	4	N	0.039604
14N	CMIP	NPHP4	33	5	4	N	0.105263
14N	CD97	EMR2	84	6	4	N	0.0444444
14N	VAPB	ATPBD4	59	9	2	N	0.0294118
14N	UTRN	ARHGAP18	123	39	2	N	0.0123457
						#R:recurrent fusions in tumor samples;T:fusions in tumor samples;N:fusions in normal samples
